# Supplementary material
Source: MDPI journal article supplement (https://www.mdpi.com/2225-1154/7/3/42)
Supplement: s1 [file s1]

Table S3: Tukey post hoc test results. Tukey results indicated significant differences ( $p < 0.05$ ) among GPP reduction values of conifer, broad-leaf deciduous and evergreen species for all considered years. Bold indicates significance at  $p < 0.05$ .

| <b>GPP reduction 2000</b> | Broad-leaf deciduous | Conifers        | Broad-leaf evergreen | <b>GPP reduction 2006</b> | Broad-leaf deciduous | Conifers        | Broad-leaf evergreen |
|---------------------------|----------------------|-----------------|----------------------|---------------------------|----------------------|-----------------|----------------------|
| Broad-leaf deciduous      |                      | <b>0.000022</b> | <b>0.000022</b>      | Broad-leaf deciduous      |                      | <b>0.000022</b> | <b>0.000022</b>      |
| Conifers                  | <b>0.000022</b>      |                 | <b>0.000444</b>      | Conifers                  | <b>0.000022</b>      |                 | <b>0.000039</b>      |
| Broad-leaf evergreen      | <b>0.000022</b>      | <b>0.000444</b> |                      | Broad-leaf evergreen      | <b>0.000022</b>      | <b>0.000039</b> |                      |
| <b>GPP reduction 2001</b> | Broad-leaf deciduous | Conifers        | Broad-leaf evergreen | <b>GPP reduction 2007</b> | Broad-leaf deciduous | Conifers        | Broad-leaf evergreen |
| Broad-leaf deciduous      |                      | <b>0.000022</b> | <b>0.000022</b>      | Broad-leaf deciduous      |                      | <b>0.000022</b> | <b>0.000022</b>      |
| Conifers                  | <b>0.000022</b>      |                 | <b>0.000022</b>      | Conifers                  | <b>0.000022</b>      |                 | <b>0.000027</b>      |
| Broad-leaf evergreen      | <b>0.000022</b>      | <b>0.000022</b> |                      | Broad-leaf evergreen      | <b>0.000022</b>      | <b>0.000027</b> |                      |
| <b>GPP reduction 2002</b> | Broad-leaf deciduous | Conifers        | Broad-leaf evergreen | <b>GPP reduction 2008</b> | Broad-leaf deciduous | Conifers        | Broad-leaf evergreen |
| Broad-leaf deciduous      |                      | <b>0.000022</b> | <b>0.000022</b>      | Broad-leaf deciduous      |                      | <b>0.000022</b> | <b>0.000022</b>      |
| Conifers                  | <b>0.000022</b>      |                 | <b>0.000025</b>      | Conifers                  | <b>0.000022</b>      |                 | <b>0.000301</b>      |
| Broad-leaf evergreen      | <b>0.000022</b>      | <b>0.000025</b> |                      | Broad-leaf evergreen      | <b>0.000022</b>      | <b>0.000301</b> |                      |
| <b>GPP reduction 2003</b> | Broad-leaf deciduous | Conifers        | Broad-leaf evergreen | <b>GPP reduction 2009</b> | Broad-leaf deciduous | Conifers        | Broad-leaf evergreen |
| Broad-leaf deciduous      |                      | <b>0.000022</b> | <b>0.000022</b>      | Broad-leaf deciduous      |                      | <b>0.000022</b> | <b>0.000022</b>      |
| Conifers                  | <b>0.000022</b>      |                 | <b>0.000022</b>      | Conifers                  | <b>0.000022</b>      |                 | <b>0.015597</b>      |
| Broad-leaf evergreen      | <b>0.000022</b>      | <b>0.000022</b> |                      | Broad-leaf evergreen      | <b>0.000022</b>      | <b>0.015597</b> |                      |
| <b>GPP reduction 2004</b> | Broad-leaf deciduous | Conifers        | Broad-leaf evergreen | <b>GPP reduction 2010</b> | Broad-leaf deciduous | Conifers        | Broad-leaf evergreen |
| Broad-leaf deciduous      |                      | <b>0.000022</b> | <b>0.000022</b>      | Broad-leaf deciduous      |                      | <b>0.000022</b> | <b>0.000022</b>      |
| Conifers                  | <b>0.000022</b>      |                 | <b>0.000022</b>      | Conifers                  | <b>0.000022</b>      |                 | <b>0.000051</b>      |
| Broad-leaf evergreen      | <b>0.000022</b>      | <b>0.000022</b> |                      | Broad-leaf evergreen      | <b>0.000022</b>      | <b>0.000051</b> |                      |
| <b>GPP reduction 2005</b> | Broad-leaf deciduous | Conifers        | Broad-leaf evergreen |                           |                      |                 |                      |
| Broad-leaf deciduous      |                      | <b>0.000022</b> | <b>0.000022</b>      |                           |                      |                 |                      |
| Conifers                  | <b>0.000022</b>      |                 | <b>0.000022</b>      |                           |                      |                 |                      |
| Broad-leaf evergreen      | <b>0.000022</b>      | <b>0.000022</b> |                      |                           |                      |                 |                      |
