# Supplementary material
Source: MDPI journal article supplement (https://www.mdpi.com/2225-1154/7/3/42)

Figure S2: Scatterplots between potential surface temperature ( $\Theta_s$ ) and the complementary values of crown defoliation ( $\Gamma$ ) to derive mTVWI.

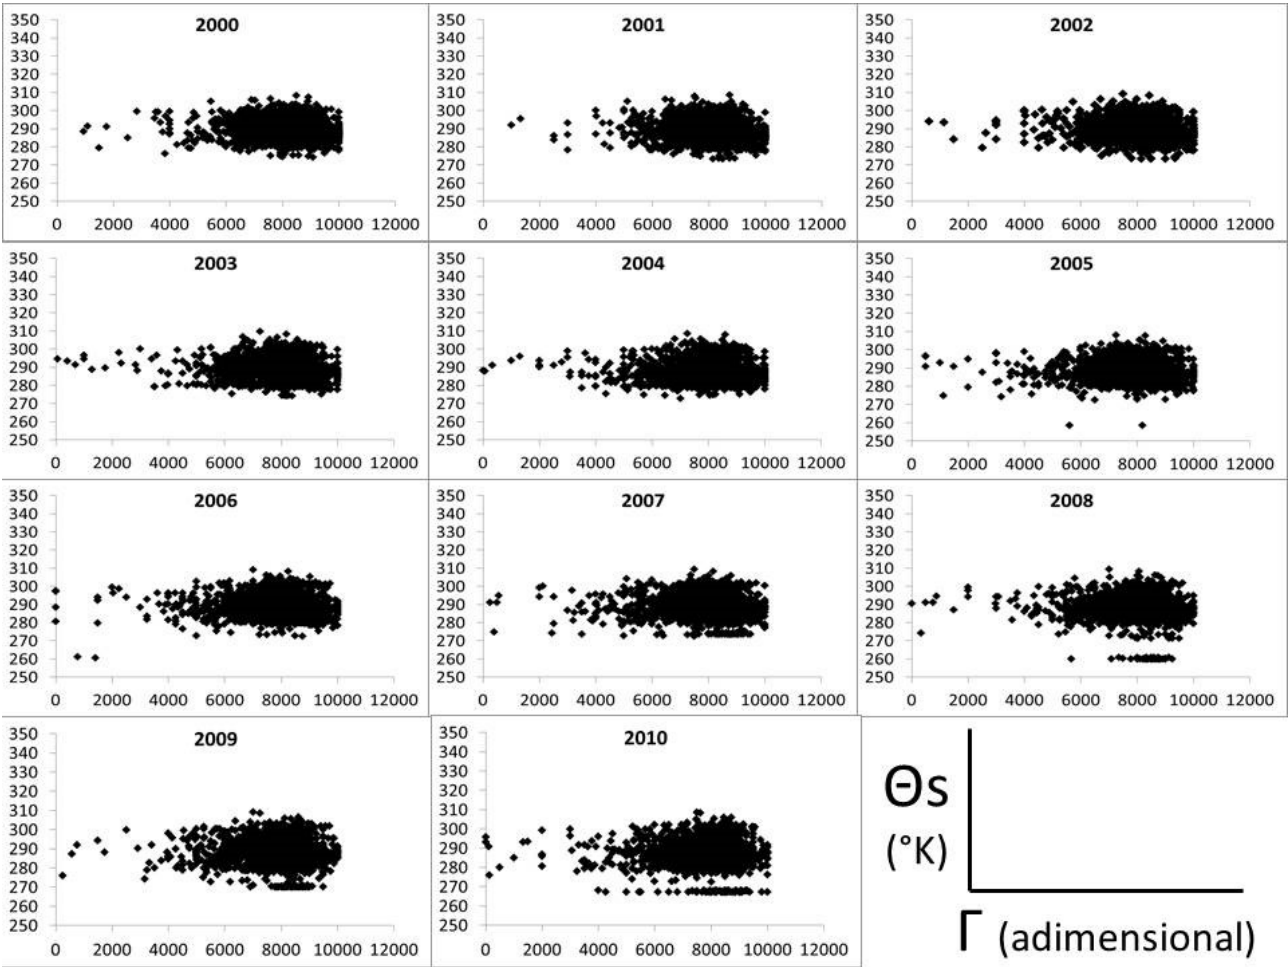

Supplement: s1 [file s1 › Figure S2.pdf]
