# Supplementary material
Source: MDPI journal article supplement (https://www.mdpi.com/2225-1154/7/3/42)

Figure S3: Analysis of variance (ANOVA) results. ANOVA indicated significant differences ( $p<0.05$ ) among mTVWI of conifer, broad-leaf deciduous and evergreen species for all considered years.

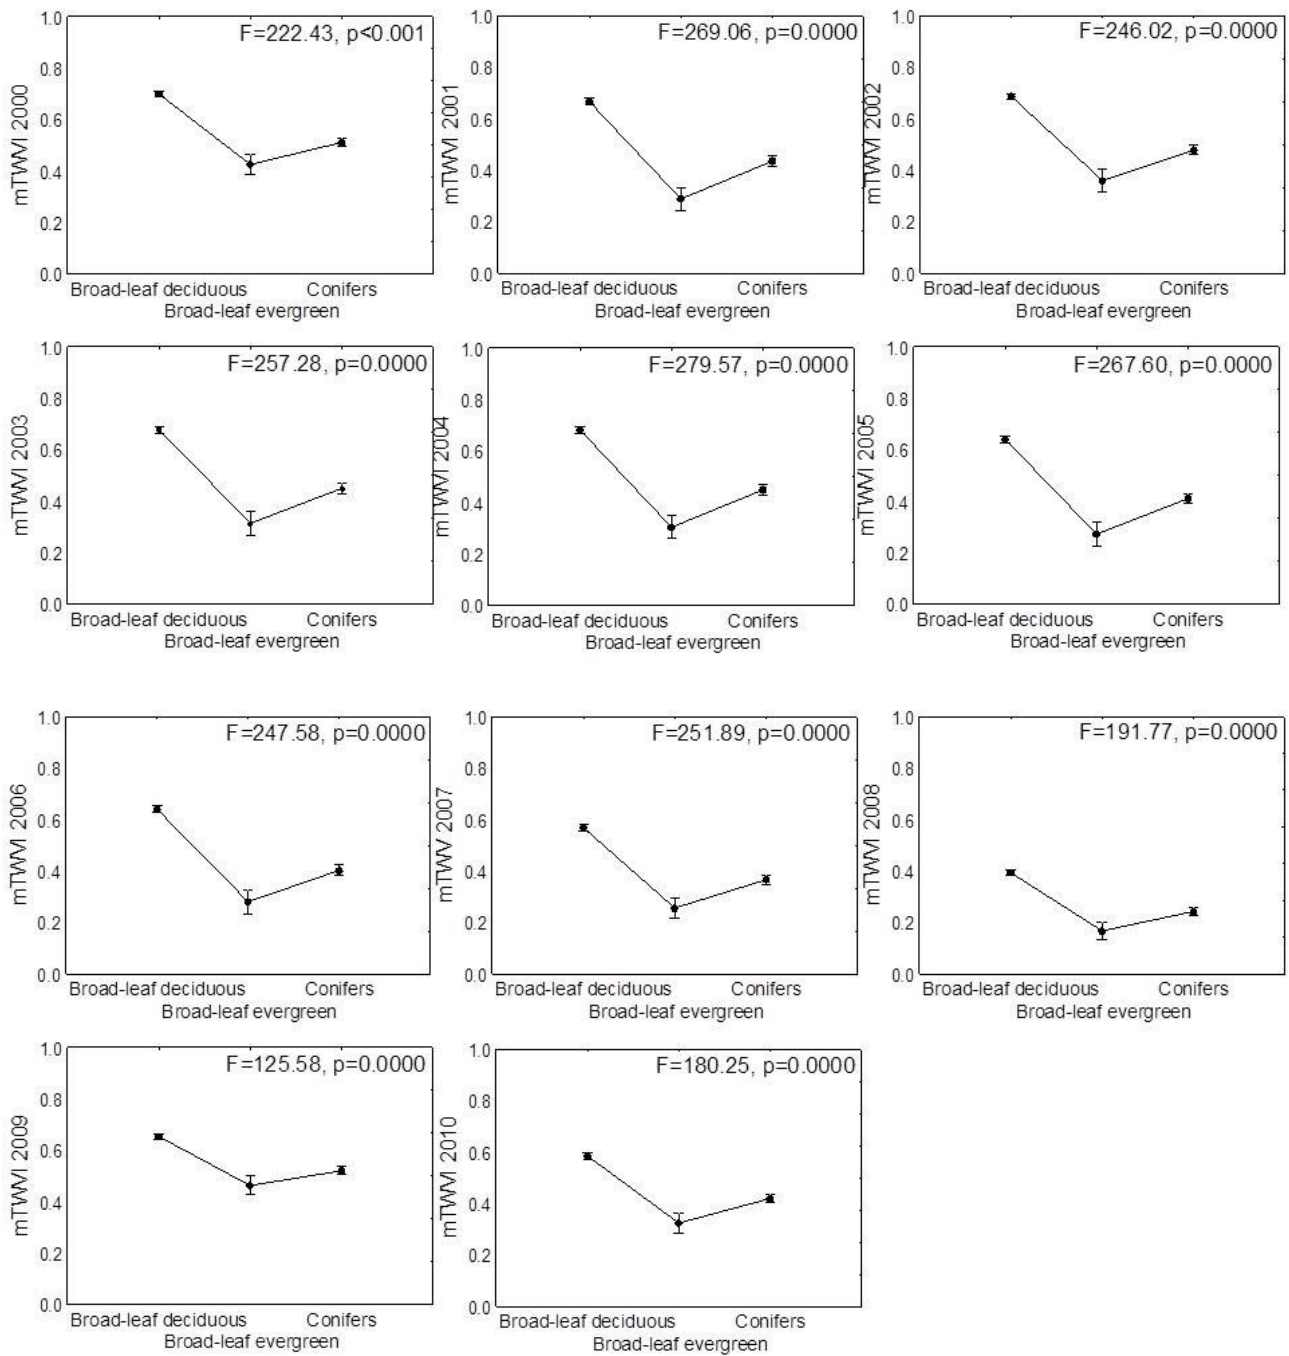

Supplement: s1 [file s1 › Figure S3.pdf]
