# Supplementary material
Source: MDPI journal article supplement (https://www.mdpi.com/2225-1154/7/3/42)

Figure S4: The standard deviations of the mean species-specific GPP reduction (%) over the time period 2000-2010.

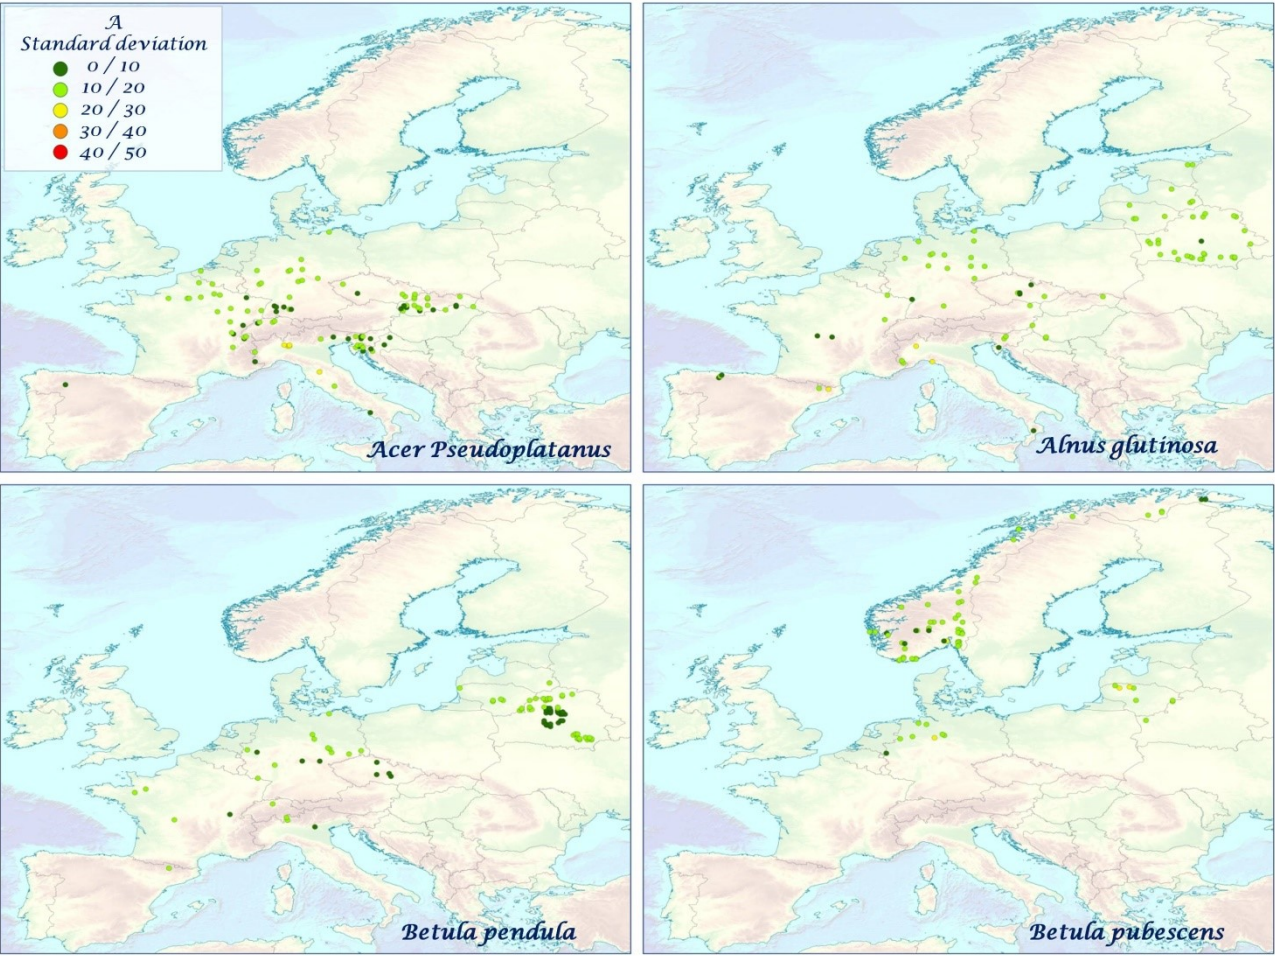

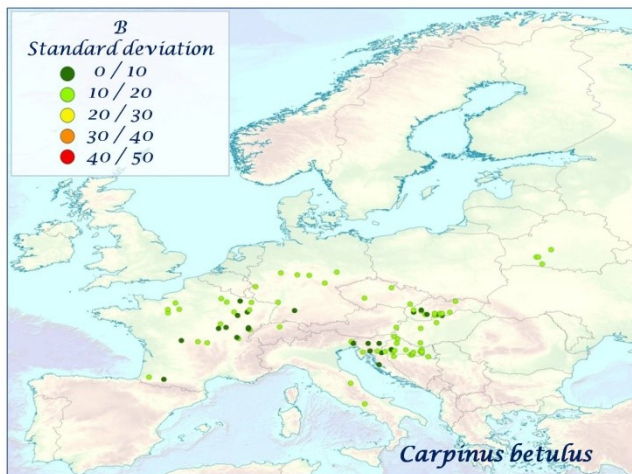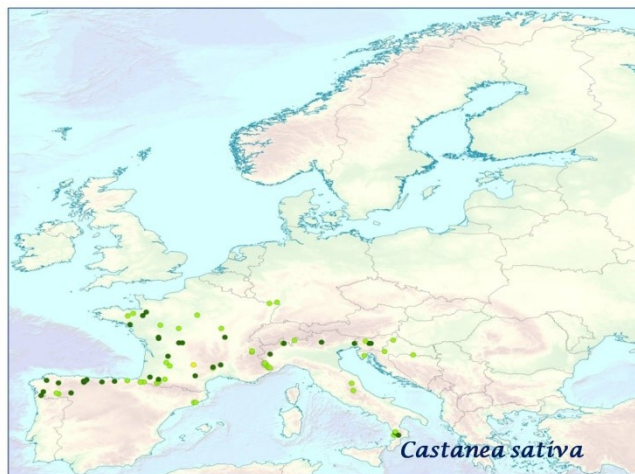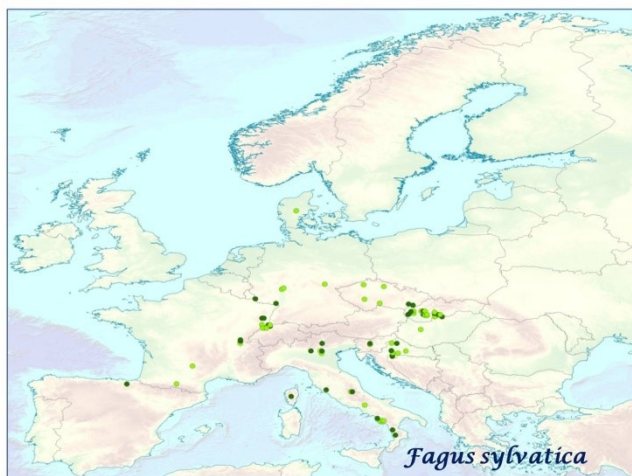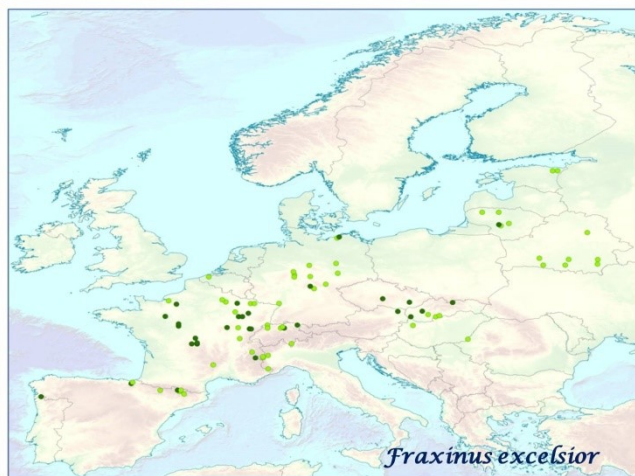

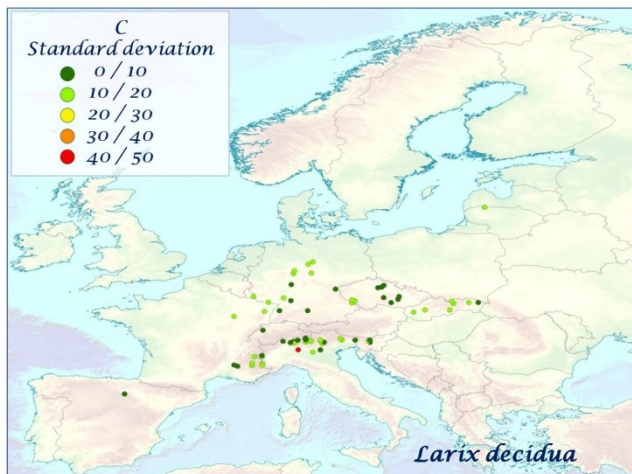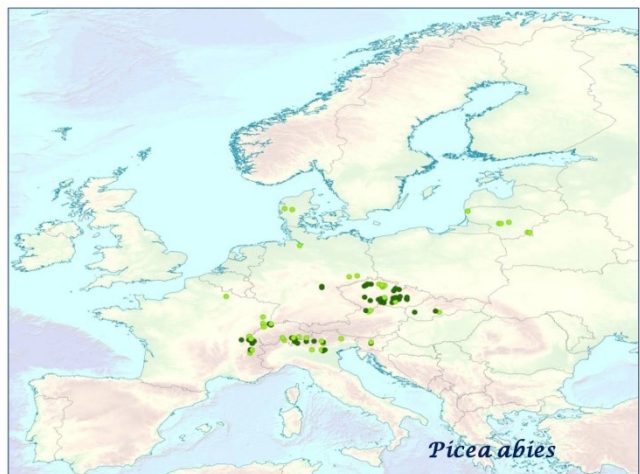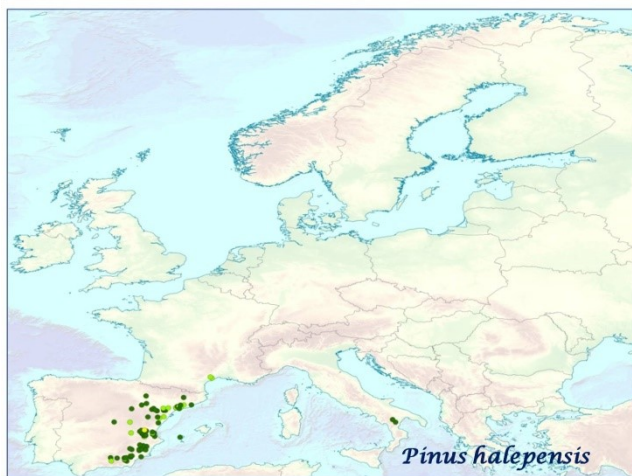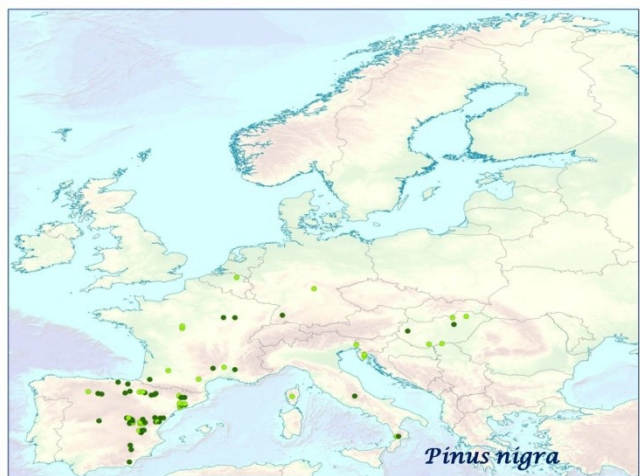

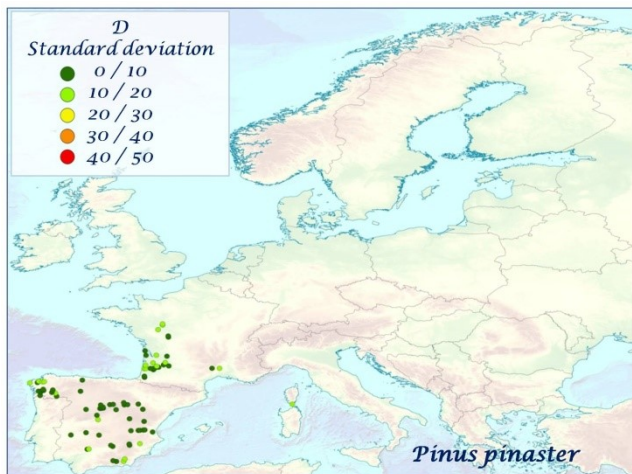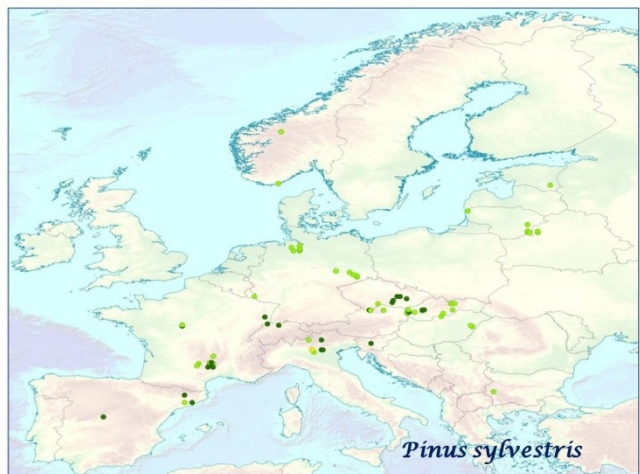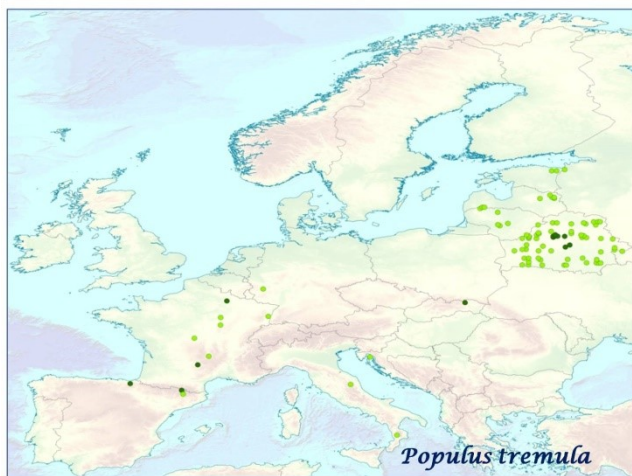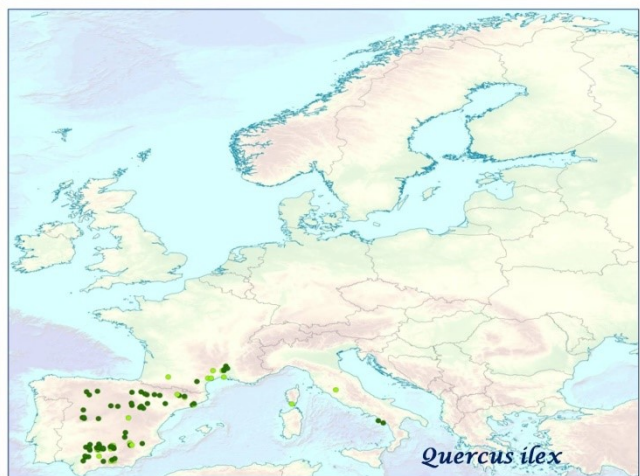

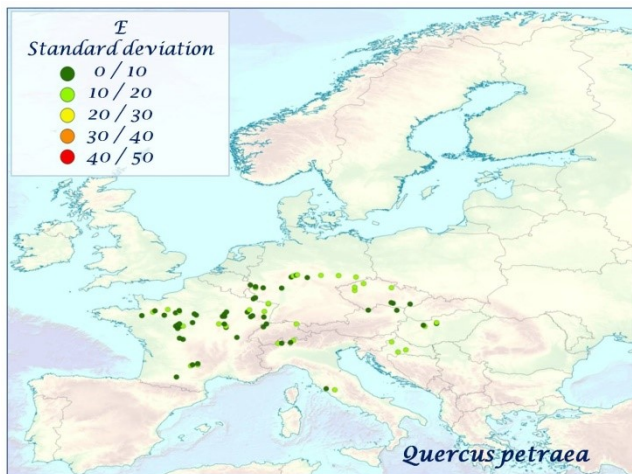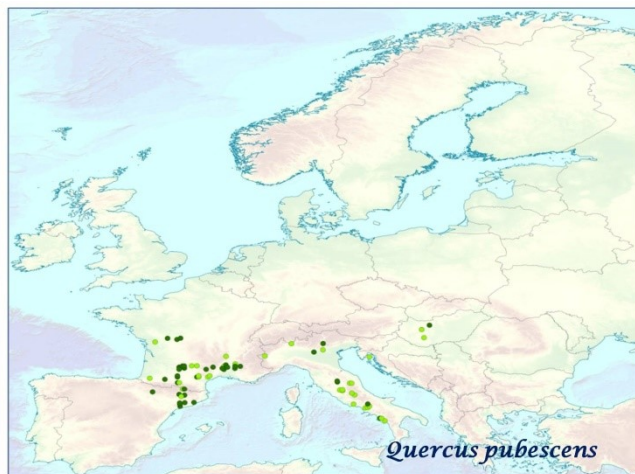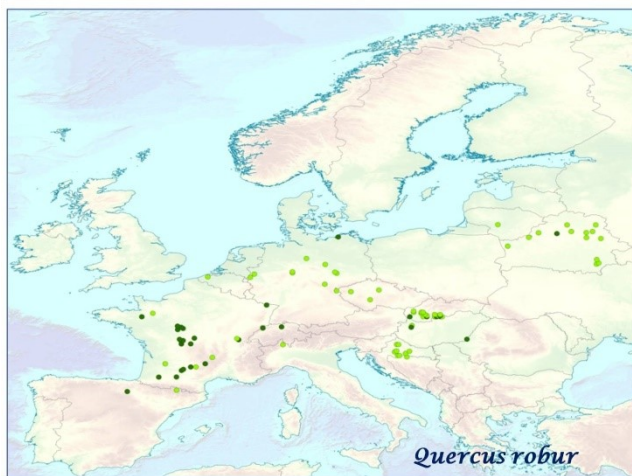

Supplement: s1 [file s1 › Figure S4.pdf]
