# Supplementary material
Source: MDPI journal article supplement (https://www.mdpi.com/2225-1154/7/3/42)
Supplement: s1 [file s1 › Table S1.pdf]

Table S1 Average mTVWI and relative standard deviation over the time period 2000-2010.

| SPECIES                            | mTVWI     |           |           |           |           |           |           |           |           |           |           |
|------------------------------------|-----------|-----------|-----------|-----------|-----------|-----------|-----------|-----------|-----------|-----------|-----------|
|                                    | 2000      | 2001      | 2002      | 2003      | 2004      | 2005      | 2006      | 2007      | 2008      | 2009      | 2010      |
| <b><u>Conifer</u></b>              |           |           |           |           |           |           |           |           |           |           |           |
| <i>Larix decidua</i>               | 0.53±0.27 | 0.48±0.30 | 0.51±0.29 | 0.48±0.31 | 0.49±0.31 | 0.45±0.30 | 0.46±0.30 | 0.39±0.26 | 0.27±0.18 | 0.55±0.23 | 0.46±0.22 |
| <i>Picea abies</i>                 | 0.53±0.21 | 0.47±0.24 | 0.49±0.23 | 0.47±0.25 | 0.48±0.24 | 0.43±0.25 | 0.43±0.27 | 0.37±0.20 | 0.25±0.15 | 0.51±0.23 | 0.44±0.21 |
| <i>Pinus halepensis</i>            | 0.40±0.14 | 0.29±0.16 | 0.37±0.15 | 0.32±0.14 | 0.31±0.15 | 0.30±0.16 | 0.29±0.18 | 0.27±0.12 | 0.18±0.10 | 0.49±0.13 | 0.34±0.16 |
| <i>Pinus nigra</i>                 | 0.43±0.20 | 0.34±0.22 | 0.40±0.21 | 0.35±0.22 | 0.35±0.23 | 0.31±0.24 | 0.31±0.25 | 0.28±0.18 | 0.19±0.15 | 0.46±0.20 | 0.36±0.20 |
| <i>Pinus pinaster</i>              | 0.51±0.21 | 0.42±0.22 | 0.46±0.21 | 0.44±0.21 | 0.44±0.22 | 0.38±0.22 | 0.35±0.23 | 0.38±0.19 | 0.23±0.14 | 0.49±0.17 | 0.38±0.19 |
| <i>Pinus sylvestris</i>            | 0.68±0.16 | 0.64±0.20 | 0.67±0.18 | 0.66±0.20 | 0.66±0.20 | 0.62±0.20 | 0.61±0.21 | 0.53±0.17 | 0.35±0.12 | 0.63±0.15 | 0.56±0.15 |
| <b><u>Broad-leaf deciduous</u></b> |           |           |           |           |           |           |           |           |           |           |           |
| <i>Acer pseudoplatanus</i>         | 0.60±0.17 | 0.57±0.19 | 0.59±0.19 | 0.58±0.19 | 0.60±0.19 | 0.56±0.22 | 0.54±0.24 | 0.50±0.19 | 0.33±0.15 | 0.58±0.20 | 0.53±0.18 |
| <i>Alnus glutinosa</i>             | 0.77±0.17 | 0.75±0.19 | 0.76±0.17 | 0.77±0.19 | 0.76±0.18 | 0.72±0.18 | 0.72±0.18 | 0.62±0.17 | 0.42±0.12 | 0.70±0.12 | 0.61±0.13 |
| <i>Betula pendula</i>              | 0.81±0.15 | 0.80±0.16 | 0.80±0.14 | 0.82±0.17 | 0.81±0.16 | 0.76±0.16 | 0.77±0.15 | 0.74±0.21 | 0.59±0.28 | 0.79±0.16 | 0.73±0.19 |
| <i>Betula pubescens</i>            | 0.86±0.09 | 0.87±0.09 | 0.87±0.09 | 0.87±0.09 | 0.85±0.09 | 0.80±0.11 | 0.81±0.11 | 0.74±0.10 | 0.49±0.09 | 0.77±0.09 | 0.73±0.24 |
| <i>Carpinus betulus</i>            | 0.66±0.10 | 0.64±0.11 | 0.67±0.11 | 0.65±0.12 | 0.67±0.11 | 0.63±0.11 | 0.60±0.14 | 0.54±0.09 | 0.36±0.09 | 0.58±0.15 | 0.52±0.13 |
| <i>Castanea sativa</i>             | 0.62±0.19 | 0.56±0.21 | 0.59±0.20 | 0.57±0.21 | 0.57±0.21 | 0.53±0.23 | 0.52±0.25 | 0.48±0.19 | 0.32±0.15 | 0.56±0.20 | 0.49±0.20 |
| <i>Fagus sylvatica</i>             | 0.51±0.18 | 0.45±0.23 | 0.47±0.21 | 0.46±0.23 | 0.47±0.24 | 0.42±0.22 | 0.42±0.22 | 0.36±0.19 | 0.25±0.16 | 0.51±0.20 | 0.42±0.20 |
| <i>Fraxinus excelsior</i>          | 0.71±0.15 | 0.68±0.17 | 0.70±0.16 | 0.70±0.17 | 0.70±0.16 | 0.65±0.18 | 0.65±0.18 | 0.58±0.13 | 0.39±0.11 | 0.63±0.15 | 0.58±0.14 |
| <i>Populus tremula</i>             | 0.83±0.14 | 0.81±0.17 | 0.82±0.16 | 0.84±0.17 | 0.83±0.16 | 0.78±0.15 | 0.79±0.17 | 0.70±0.16 | 0.48±0.18 | 0.74±0.13 | 0.66±0.14 |
| <i>Quercus petraea</i>             | 0.69±0.11 | 0.65±0.13 | 0.67±0.11 | 0.66±0.12 | 0.67±0.12 | 0.64±0.13 | 0.63±0.13 | 0.54±0.11 | 0.39±0.08 | 0.66±0.10 | 0.59±0.09 |
| <i>Quercus pubescens</i>           | 0.57±0.13 | 0.47±0.16 | 0.53±0.15 | 0.48±0.16 | 0.49±0.16 | 0.48±0.17 | 0.50±0.18 | 0.40±0.15 | 0.30±0.11 | 0.62±0.11 | 0.51±0.13 |
| <i>Quercus robur</i>               | 0.75±0.11 | 0.71±0.11 | 0.73±0.11 | 0.72±0.12 | 0.73±0.12 | 0.69±0.12 | 0.69±0.13 | 0.59±0.11 | 0.41±0.10 | 0.69±0.13 | 0.63±0.11 |
| <b><u>Broad-leaf evergreen</u></b> |           |           |           |           |           |           |           |           |           |           |           |
| <i>Quercus ilex</i>                | 0.43±0.15 | 0.29±0.15 | 0.36±0.15 | 0.31±0.15 | 0.30±0.16 | 0.27±0.17 | 0.28±0.18 | 0.26±0.13 | 0.17±0.10 | 0.46±0.13 | 0.32±0.16 |
