# Supplementary material
Source: MDPI journal article supplement (https://www.mdpi.com/2225-1154/7/3/42)
Supplement: s1 [file s1 › Table S2.pdf]

Table S2: Tukey post hoc test results. Tukey results indicated significant differences ( $p < 0.05$ ) among mTVWI values of conifer, broad-leaf deciduous and evergreen species for all considered years. Bold indicates significance at  $p < 0.05$ .

| <b>mTVWI 2000</b>    | Broad-leaf deciduous | Broad-leaf evergreen | Conifers        | <b>mTVWI 2006</b>    | Broad-leaf deciduous | Broad-leaf evergreen | Conifers        |
|----------------------|----------------------|----------------------|-----------------|----------------------|----------------------|----------------------|-----------------|
| Broad-leaf deciduous |                      | <b>0.000022</b>      | <b>0.000022</b> | Broad-leaf deciduous |                      | <b>0.000022</b>      | <b>0.000022</b> |
| Broad-leaf evergreen | <b>0.000022</b>      |                      | <b>0.000209</b> | Broad-leaf evergreen | <b>0.000022</b>      |                      | <b>0.000029</b> |
| Conifers             | <b>0.000022</b>      | <b>0.000209</b>      |                 | Conifers             | <b>0.000022</b>      | <b>0.000029</b>      |                 |
| <b>mTVWI 2001</b>    | Broad-leaf deciduous | Broad-leaf evergreen | Conifers        | <b>mTVWI 2007</b>    | Broad-leaf deciduous | Broad-leaf evergreen | Conifers        |
| Broad-leaf deciduous |                      | <b>0.000022</b>      | <b>0.000022</b> | Broad-leaf deciduous |                      | <b>0.000022</b>      | <b>0.000022</b> |
| Broad-leaf evergreen | <b>0.000022</b>      |                      | <b>0.000022</b> | Broad-leaf evergreen | <b>0.000022</b>      |                      | <b>0.000023</b> |
| Conifers             | <b>0.000022</b>      | <b>0.000022</b>      |                 | Conifers             | <b>0.000022</b>      | <b>0.000023</b>      |                 |
| <b>mTVWI 2002</b>    | Broad-leaf deciduous | Broad-leaf evergreen | Conifers        | <b>mTVWI 2008</b>    | Broad-leaf deciduous | Broad-leaf evergreen | Conifers        |
| Broad-leaf deciduous |                      | <b>0.000022</b>      | <b>0.000022</b> | Broad-leaf deciduous |                      | <b>0.000022</b>      | <b>0.000022</b> |
| Broad-leaf evergreen | <b>0.000022</b>      |                      | <b>0.000023</b> | Broad-leaf evergreen | <b>0.000022</b>      |                      | <b>0.000187</b> |
| Conifers             | <b>0.000022</b>      | <b>0.000023</b>      |                 | Conifers             | <b>0.000022</b>      | <b>0.000187</b>      |                 |
| <b>mTVWI 2003</b>    | Broad-leaf deciduous | Broad-leaf evergreen | Conifers        | <b>mTVWI 2009</b>    | Broad-leaf deciduous | Broad-leaf evergreen | Conifers        |
| Broad-leaf deciduous |                      | <b>0.000022</b>      | <b>0.000022</b> | Broad-leaf deciduous |                      | <b>0.000022</b>      | <b>0.000022</b> |
| Broad-leaf evergreen | <b>0.000022</b>      |                      | <b>0.000022</b> | Broad-leaf evergreen | <b>0.000022</b>      |                      | <b>0.012364</b> |
| Conifers             | <b>0.000022</b>      | <b>0.000022</b>      |                 | Conifers             | <b>0.000022</b>      | <b>0.012364</b>      |                 |
| <b>mTVWI 2004</b>    | Broad-leaf deciduous | Broad-leaf evergreen | Conifers        | <b>mTVWI 2010</b>    | Broad-leaf deciduous | Broad-leaf evergreen | Conifers        |
| Broad-leaf deciduous |                      | <b>0.000022</b>      | <b>0.000022</b> | Broad-leaf deciduous |                      | <b>0.000022</b>      | <b>0.000022</b> |
| Broad-leaf evergreen | <b>0.000022</b>      |                      | <b>0.000022</b> | Broad-leaf evergreen | <b>0.000022</b>      |                      | <b>0.000049</b> |
| Conifers             | <b>0.000022</b>      | <b>0.000022</b>      |                 | Conifers             | <b>0.000022</b>      | <b>0.000049</b>      |                 |
| <b>mTVWI 2005</b>    | Broad-leaf deciduous | Broad-leaf evergreen | Conifers        |                      |                      |                      |                 |
| Broad-leaf deciduous |                      | <b>0.000022</b>      | <b>0.000022</b> |                      |                      |                      |                 |
| Broad-leaf evergreen | <b>0.000022</b>      |                      | <b>0.000022</b> |                      |                      |                      |                 |
| Conifers             | <b>0.000022</b>      | <b>0.000022</b>      |                 |                      |                      |                      |                 |
