# Supplementary material
Source: MDPI journal article supplement (https://www.mdpi.com/2225-1154/7/3/42)

Figure S1: Distribution and species composition of the 1623 European plot sites used in this study.

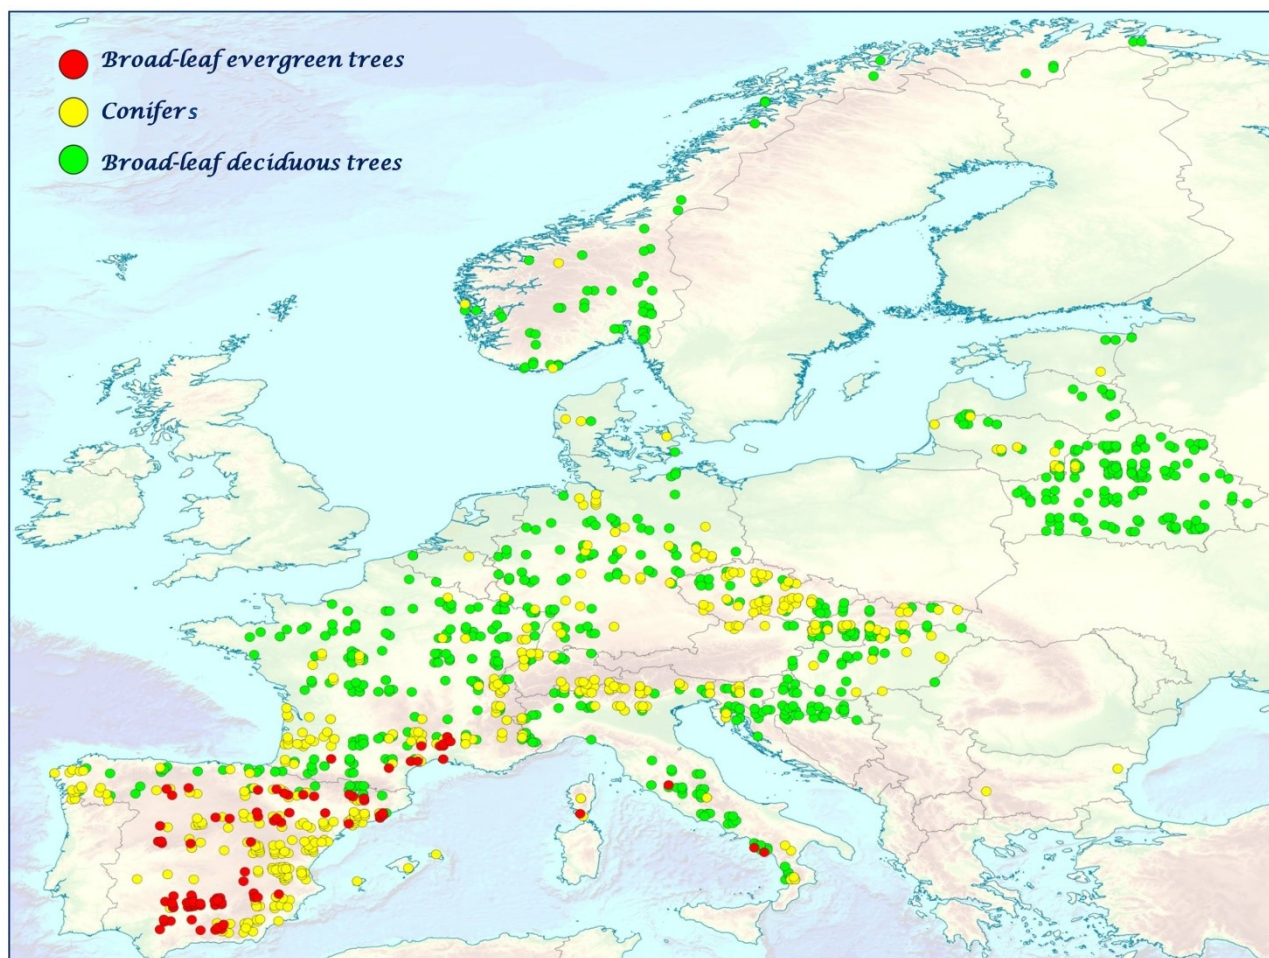

Supplement: s1 [file s1 › Figure S1.pdf]
